# Supplementary material
Source: PubMed Central journal article supplement (PMC8688263)
Supplement: NIHMS1737991-supplement-1.pdf [file NIHMS1737991-supplement-1.pdf]

1  
2  
3  
4  
5  
6  
7  
8  
9  
10  
11  
12  
13  
14  
15  
16  
17  
18  
19  
20  
21  
22  
23  
24  
25  
26  
27  
28  
29  
30  
31  
32  
33  
34  
35  
36  
37  
38  
39  
40  
41  
42  
43  
44  
45  
46  
47

Supplemental Table 1. Study Definitions by ICD-9-CM and ICD-10-CM Codes

| Variable                                                                                                       | ICD-9-CM        | ICD-10-CM | Comment                                                                                                                                                                                                                                                                                                                                                                                                                                                                                                                                                                                                           |
|----------------------------------------------------------------------------------------------------------------|-----------------|-----------|-------------------------------------------------------------------------------------------------------------------------------------------------------------------------------------------------------------------------------------------------------------------------------------------------------------------------------------------------------------------------------------------------------------------------------------------------------------------------------------------------------------------------------------------------------------------------------------------------------------------|
| <b>Decompensation and Portal Hypertension Variables</b>                                                        |                 |           |                                                                                                                                                                                                                                                                                                                                                                                                                                                                                                                                                                                                                   |
| Decomp<br>(decompensation<br>event yes/no<br>variable)<br><br>Decomp_c (number<br>of decompensation<br>events) |                 |           | Clinical decompensation defined as presence of any of these:<br>varices with bleeding, hepatic encephalopathy, hepatorenal<br>syndrome, hepatopulmonary syndrome, spontaneous bacterial<br>peritonitis. Generally, it does not include non-bleeding varices<br>or ascites; however, ascites <i>and</i> presence of portal<br>hypertension or other chronic liver disease is counted as both<br>a decompensation event and cirrhosis.<br><br>Records showing a decompensation event were categorized<br>as having cirrhosis. Biliary cirrhosis was counted as cirrhosis<br>only when decompensation also occurred. |
| Esophageal<br>varices, bleeding                                                                                | 456.0<br>456.20 | I85.01    | <u>ICD-9 and 10 Code Descriptions</u><br>456.0 Esophageal varices with bleeding<br>456.20 Esophageal varices in diseases classified elsewhere,<br>with bleeding<br>I85.01 Esophageal varices with bleeding                                                                                                                                                                                                                                                                                                                                                                                                        |

|                                                                               |                                       |                 |        |                                                                                                                                                                                                                                                                                                                                |
|-------------------------------------------------------------------------------|---------------------------------------|-----------------|--------|--------------------------------------------------------------------------------------------------------------------------------------------------------------------------------------------------------------------------------------------------------------------------------------------------------------------------------|
| 1<br>2<br>3<br>4<br>5<br>6<br>7<br>8<br>9<br>10<br>11<br>12<br>13<br>14<br>15 | Esophageal<br>varices, no<br>bleeding | 456.1<br>456.21 | I85.00 | <u>ICD-9 and 10 Code Descriptions</u><br>456.1 Esophageal varices without mention of bleeding<br>456.21 Esophageal varices in diseases classified elsewhere,<br>without mention of bleeding<br>I85.00 Esophageal varices without bleeding<br><br><i>Used to capture cirrhosis, but not a clinical decompensation<br/>event</i> |
| 16<br>17<br>18<br>19<br>20                                                    | Hepatic<br>encephalopathy             | 572.2           |        | <u>ICD-9 Code Descriptions</u><br>572.2 Hepatic encephalopathy                                                                                                                                                                                                                                                                 |
| 21<br>22<br>23<br>24<br>25<br>26                                              | Hepatorenal<br>syndrome               | 572.4           | K76.7  | <u>ICD-9 and 10 Code Descriptions</u><br>572.4 Hepatorenal syndrome<br>K76.7 Hepatorenal syndrome                                                                                                                                                                                                                              |
| 27<br>28<br>29<br>30<br>31<br>32                                              | Hepatopulmonary<br>syndrome           | 573.5           | K76.81 | <u>ICD-9 and 10 Code Descriptions</u><br>573.5 Hepatopulmonary syndrome<br>K76.81 Hepatopulmonary syndrome                                                                                                                                                                                                                     |
| 33<br>34<br>35<br>36<br>37<br>38<br>39                                        | Spontaneous<br>bacterial peritonitis  | 567.2           | K65.2  | <u>ICD-9 and 10 Code Descriptions</u><br>567.2 Spontaneous bacterial peritonitis<br>K65.2 Spontaneous bacterial peritonitis                                                                                                                                                                                                    |
| 40<br>41<br>42<br>43<br>44<br>45<br>46<br>47                                  | Ascites                               | 789.5           | R18    | <u>ICD-9 and 10 Code Descriptions</u>                                                                                                                                                                                                                                                                                          |

1  
2  
3  
4  
5  
6  
7  
8  
9  
10  
11  
12  
13  
14  
15  
16  
17  
18  
19  
20  
21  
22  
23  
24  
25  
26  
27  
28  
29  
30  
31  
32  
33  
34  
35  
36  
37  
38  
39  
40  
41  
42  
43  
44  
45  
46  
47

|                                  |       |                    |                                                                                                                                                                                                                                                                                                                                                                                                                                                                                                                                                                                                          |
|----------------------------------|-------|--------------------|----------------------------------------------------------------------------------------------------------------------------------------------------------------------------------------------------------------------------------------------------------------------------------------------------------------------------------------------------------------------------------------------------------------------------------------------------------------------------------------------------------------------------------------------------------------------------------------------------------|
|                                  |       | R18.8              | 789.5 Ascites<br>R18 Ascites<br>R18.8 Other ascites                                                                                                                                                                                                                                                                                                                                                                                                                                                                                                                                                      |
| <b>Cirrhosis Variables</b>       |       |                    |                                                                                                                                                                                                                                                                                                                                                                                                                                                                                                                                                                                                          |
| Cirrhosis: Alcohol liver disease | 571.2 | K70.3<br>K70.3[01] | <u>ICD-9 Code Descriptions</u><br>571.2 Alcoholic cirrhosis of liver<br><br><u>ICD-10 Code Descriptions</u><br>K70.3 Alcoholic cirrhosis of liver<br>K70.3[01] Alcoholic cirrhosis of liver without/with ascites                                                                                                                                                                                                                                                                                                                                                                                         |
| Cirrhosis: Autoimmune            | 571.6 | K74.3<br>K74.5     | <u>ICD-9 Code Descriptions</u><br>571.6 Biliary cirrhosis <i>[only coded as cirrhosis if record also shows a portal hypertensive decompensation event (including non-bleeding varices) or portal hypertension, otherwise it is coded as "other chronic liver disease without cirrhosis"]</i><br><br><u>ICD-10 Code Descriptions</u><br><i>The following group of codes are only coded as cirrhosis if record also shows a portal hypertensive decompensation event (including non-bleeding varices) or portal hypertension, otherwise it is coded as "other chronic liver disease without cirrhosis"</i> |

|                    |                                                                                            |                                                                                                                                   |                                                                                                                                                                                                                                                                                                                                                                                                                                                                                                                                                                  |
|--------------------|--------------------------------------------------------------------------------------------|-----------------------------------------------------------------------------------------------------------------------------------|------------------------------------------------------------------------------------------------------------------------------------------------------------------------------------------------------------------------------------------------------------------------------------------------------------------------------------------------------------------------------------------------------------------------------------------------------------------------------------------------------------------------------------------------------------------|
|                    |                                                                                            |                                                                                                                                   | K74.3 Primary biliary cirrhosis, Chronic nonsuppurative destructive cholangitis<br>K74.5 Biliary cirrhosis, unspecified                                                                                                                                                                                                                                                                                                                                                                                                                                          |
| Cirrhosis: Other   |                                                                                            | K74.4                                                                                                                             | <u>ICD-10 Code Descriptions</u><br>K74.4 Secondary biliary cirrhosis <i>[only coded as cirrhosis if record also shows a portal hypertensive decompensation event (including non-bleeding varices) or portal hypertension, otherwise it is coded as “other chronic liver disease without cirrhosis”]</i>                                                                                                                                                                                                                                                          |
| Cirrhosis: Unknown | 571.5<br>572.3<br>456.0<br>456.1<br>456.2[01]<br>572.2<br>572.4<br>573.5<br>567.2<br>789.5 | K71.7<br>K72.1[01]<br>K74.6<br>K74.6[09]<br>K76.6<br>K65.2<br>K71.51<br>K72.9[01]<br>K76.7<br>K76.81<br>I85.0<br>I85.0[01]<br>R18 | <u>ICD-9 Code Descriptions</u><br>571.5 Cirrhosis of liver without mention of alcohol<br>572.3 Portal hypertension <i>[only coded as cirrhosis when accompanied by another chronic liver disease or cirrhosis code, or non-bleeding varices or any decompensation event] – unknown</i><br>456.0 Esophageal varices with bleeding<br>456.1 Esophageal varices without mention of bleeding<br>456.20 Esophageal varices in diseases classified elsewhere, with bleeding<br>456.21 Esophageal varices in diseases classified elsewhere, without mention of bleeding |

1  
2  
3  
4  
5  
6  
7  
8  
9  
10  
11  
12  
13  
14  
15  
16  
17  
18  
19  
20  
21  
22  
23  
24  
25  
26  
27  
28  
29  
30  
31  
32  
33  
34  
35  
36  
37  
38  
39  
40  
41  
42  
43  
44  
45  
46  
47

|  |  |       |                                                                                                                                                                                                                                                                                                                                                                                                                                                                                                                                                                                                                                                                                                                                                                                                                                                                                                                                                                                                                                                                                                       |
|--|--|-------|-------------------------------------------------------------------------------------------------------------------------------------------------------------------------------------------------------------------------------------------------------------------------------------------------------------------------------------------------------------------------------------------------------------------------------------------------------------------------------------------------------------------------------------------------------------------------------------------------------------------------------------------------------------------------------------------------------------------------------------------------------------------------------------------------------------------------------------------------------------------------------------------------------------------------------------------------------------------------------------------------------------------------------------------------------------------------------------------------------|
|  |  | R18.8 | <p>572.2 Hepatic encephalopathy</p> <p>572.4 Hepatorenal syndrome</p> <p>573.5 Hepatopulmonary syndrome</p> <p>567.2 Spontaneous bacterial peritonitis</p> <p>789.5 Ascites <i>[only coded as cirrhosis when accompanied by another chronic liver disease or cirrhosis code (including portal hypertension)]</i></p> <p><u>ICD-10 Code Descriptions</u></p> <p>K71.7 Toxic liver disease with fibrosis and cirrhosis of liver</p> <p>K72.10 Chronic hepatic failure without coma</p> <p>K72.11 Chronic hepatic failure with coma</p> <p>K74.6 Other and unspecified cirrhosis of liver</p> <p>K74.60 Unspecified cirrhosis of liver</p> <p>K74.69 Other cirrhosis of liver, including Cryptogenic, Macronodular, Micronodular, Mixed type, Portal, Post-necrotic</p> <p>K76.6 Portal hypertension <i>[only coded as cirrhosis when accompanied by another chronic liver disease or cirrhosis code, or non-bleeding varices or any decompensation event] – unknown</i></p> <p>K65.2 Spontaneous bacterial peritonitis</p> <p>K71.51 Toxic liver disease with chronic active hepatitis with ascites</p> |
|--|--|-------|-------------------------------------------------------------------------------------------------------------------------------------------------------------------------------------------------------------------------------------------------------------------------------------------------------------------------------------------------------------------------------------------------------------------------------------------------------------------------------------------------------------------------------------------------------------------------------------------------------------------------------------------------------------------------------------------------------------------------------------------------------------------------------------------------------------------------------------------------------------------------------------------------------------------------------------------------------------------------------------------------------------------------------------------------------------------------------------------------------|

|                         |       |       |                                                                                                                                                                                                                                                                                                                                                                                                                                                                                                                                      |
|-------------------------|-------|-------|--------------------------------------------------------------------------------------------------------------------------------------------------------------------------------------------------------------------------------------------------------------------------------------------------------------------------------------------------------------------------------------------------------------------------------------------------------------------------------------------------------------------------------------|
|                         |       |       | <p>K76.7 Hepatorenal syndrome</p> <p>K76.81 Hepatopulmonary syndrome</p> <p>I85.0 Esophageal varices</p> <p>I85.0[01] Esophageal varices without bleeding/with bleeding</p> <p><i>This next group of codes are used to define cirrhosis ONLY when accompanied by another chronic liver disease or cirrhosis code (including portal hypertension).</i></p> <p>K72.9 Hepatic failure, unspecified</p> <p>K72.90 Hepatic failure without coma</p> <p>K72.91 Hepatic failure with coma</p> <p>R18 Ascites</p> <p>R18.8 Other ascites</p> |
| Decompensated cirrhosis |       |       | <p>Indicator variable for cirrhosis and a clinical decompensation event. Non-bleeding varices does not count as a clinical decompensation event.</p> <ul style="list-style-type: none"> <li>- Yes if has a code for decompensation event</li> <li>- No if no code for decompensation event</li> </ul>                                                                                                                                                                                                                                |
| Portal hypertension     | 572.3 | K76.6 | <p><u>ICD-9 and 10 Code Descriptions</u></p> <p>572.3 Portal hypertension</p> <p>K76.6 Portal hypertension</p>                                                                                                                                                                                                                                                                                                                                                                                                                       |

1  
2  
3  
4  
5  
6  
7  
8  
9  
10  
11  
12  
13  
14  
15  
16  
17  
18  
19  
20  
21  
22  
23  
24  
25  
26  
27  
28  
29  
30  
31  
32  
33  
34  
35  
36  
37  
38  
39  
40  
41  
42  
43  
44  
45  
46  
47

|                                                                  |                                                                                                                    |                                                                                                       |                                                                                                                                                                                                                                                                                                                                                                                                                             |
|------------------------------------------------------------------|--------------------------------------------------------------------------------------------------------------------|-------------------------------------------------------------------------------------------------------|-----------------------------------------------------------------------------------------------------------------------------------------------------------------------------------------------------------------------------------------------------------------------------------------------------------------------------------------------------------------------------------------------------------------------------|
|                                                                  |                                                                                                                    |                                                                                                       | <p>Portal hypertension variable will take one of three values:</p> <p>1 = Non-cirrhotic portal hypertension (has code for portal HTN alone, without code for cirrhosis or other specific chronic liver disease)</p> <p>2 = Cirrhotic portal hypertension + cirrhosis (has code for portal HTN and code for cirrhosis or other specific chronic liver disease)</p> <p>0 (may change to missing) = No code for portal HTN</p> |
| <b>Chronic Liver Disease Groups and Variables</b>                |                                                                                                                    |                                                                                                       |                                                                                                                                                                                                                                                                                                                                                                                                                             |
| Chronic liver disease without cirrhosis: Autoimmune hepatitis    | 571.42                                                                                                             | K75.4                                                                                                 | <p><u>ICD-9 Code Descriptions</u></p> <p>571.42 Autoimmune hepatitis</p> <p><u>ICD-10 Code Descriptions</u></p> <p>K75.4 Autoimmune Hepatitis</p>                                                                                                                                                                                                                                                                           |
| Chronic liver disease without cirrhosis: Chronic viral hepatitis | 571.4[019]<br>070.2[0123]<br>070.3[0123]<br>070.4[249]<br>070.5[249]<br>070.6<br>070.7[01]<br>070.9<br>V02.6[0129] | K71.3<br>K71.4<br>K71.5<br>K71.50<br>K73.[01289]<br>K74.[012]<br>B18.[01289]<br>B19.[01]<br>B19.1[01] | <p><u>ICD-9 Code Descriptions</u></p> <p>571.4 Chronic hepatitis</p> <p>070.2x/070.3x Viral hepatitis B with/without hepatic coma</p> <p>070.42 Hepatitis delta without mention of active hepatitis B disease with hepatic coma, Hepatitis delta with hepatitis B carrier state</p> <p>070.44 Chronic hepatitis C with hepatic coma</p> <p>070.49 Other specified viral hepatitis with hepatic coma</p>                     |

|    |  |              |                                                                  |
|----|--|--------------|------------------------------------------------------------------|
| 1  |  | B19.2        | 070.5 Other specified viral hepatitis without mention of hepatic |
| 2  |  | B19.2[01]    | coma                                                             |
| 3  |  | B19.9        | 070.52 Hepatitis delta without mention of active hepatitis B     |
| 4  |  | O98.41       | disease or hepatic coma                                          |
| 5  |  | O98.41[1239] | 070.54 Chronic hepatitis C without mention of hepatic coma       |
| 6  |  | O98.42       | 070.59 Other specified viral hepatitis without mention of        |
| 7  |  | O98.43       | hepatic coma                                                     |
| 8  |  |              | 070.6 Unspecified viral hepatitis with hepatic coma              |
| 9  |  |              | 070.7 Unspecified viral hepatitis C                              |
| 10 |  |              | 070.70 Unspecified viral hepatitis C without hepatic coma,       |
| 11 |  |              | Unspecified viral hepatitis C NOS                                |
| 12 |  |              | 070.71 Unspecified viral hepatitis C with hepatic coma           |
| 13 |  |              | 070.9 Unspecified viral hepatitis without mention of hepatic     |
| 14 |  |              | coma, Viral hepatitis NOS                                        |
| 15 |  |              | V02.6 Carrier or suspected carrier of viral hepatitis            |
| 16 |  |              | V02.60 Viral hepatitis carrier, unspecified                      |
| 17 |  |              | V02.61 Hepatitis B carrier                                       |
| 18 |  |              | V02.62 Hepatitis C carrier                                       |
| 19 |  |              | V02.69 Other viral hepatitis carrier                             |
| 20 |  |              | <u>ICD-10 Code Descriptions</u>                                  |
| 21 |  |              | K71.3 Toxic liver disease with chronic persistent hepatitis      |
| 22 |  |              | K71.4 Toxic liver disease with chronic lobular hepatitis         |
| 23 |  |              |                                                                  |
| 24 |  |              |                                                                  |
| 25 |  |              |                                                                  |
| 26 |  |              |                                                                  |
| 27 |  |              |                                                                  |
| 28 |  |              |                                                                  |
| 29 |  |              |                                                                  |
| 30 |  |              |                                                                  |
| 31 |  |              |                                                                  |
| 32 |  |              |                                                                  |
| 33 |  |              |                                                                  |
| 34 |  |              |                                                                  |
| 35 |  |              |                                                                  |
| 36 |  |              |                                                                  |
| 37 |  |              |                                                                  |
| 38 |  |              |                                                                  |
| 39 |  |              |                                                                  |
| 40 |  |              |                                                                  |
| 41 |  |              |                                                                  |
| 42 |  |              |                                                                  |
| 43 |  |              |                                                                  |
| 44 |  |              |                                                                  |
| 45 |  |              |                                                                  |
| 46 |  |              |                                                                  |
| 47 |  |              |                                                                  |



1  
2  
3  
4  
5  
6  
7  
8  
9  
10  
11  
12  
13  
14  
15  
16  
17  
18  
19  
20  
21  
22  
23  
24  
25  
26  
27  
28  
29  
30  
31  
32  
33  
34  
35  
36  
37  
38  
39  
40  
41  
42  
43  
44  
45  
46  
47

|  |  |  |                                                                                                                                                                                                                                                                                                                                                                                                                                                                                                                                                                                                                                                                                                                                                                                                                                                                                                                                                                                                        |
|--|--|--|--------------------------------------------------------------------------------------------------------------------------------------------------------------------------------------------------------------------------------------------------------------------------------------------------------------------------------------------------------------------------------------------------------------------------------------------------------------------------------------------------------------------------------------------------------------------------------------------------------------------------------------------------------------------------------------------------------------------------------------------------------------------------------------------------------------------------------------------------------------------------------------------------------------------------------------------------------------------------------------------------------|
|  |  |  | <p>K71.5 Toxic liver disease with chronic active hepatitis</p> <p>K71.50 Toxic liver disease with chronic active hepatitis without ascites</p><br><p>K73 Chronic hepatitis, not elsewhere classified</p> <p>K73.0 Chronic persistent hepatitis, not elsewhere classified</p> <p>K73.1 Chronic lobular hepatitis, not elsewhere classified</p> <p>K73.2 Chronic active hepatitis, not elsewhere classified</p> <p>K73.8 Other chronic hepatitis, not elsewhere classified</p> <p>K73.9 Chronic hepatitis, unspecified</p><br><p>K74.0 Hepatic fibrosis</p> <p>K74.1 Hepatic sclerosis</p> <p>K74.2 Hepatic fibrosis with hepatic sclerosis</p><br><p>B18.0/1 Chronic viral hepatitis B with/without delta-agent</p> <p>B18.2 Chronic viral hepatitis C</p> <p>B18.8 Other chronic viral hepatitis</p> <p>B18.9 Chronic viral hepatitis, unspecified</p><br><p>B19 Unspecified viral hepatitis</p> <p>B19.0 Unspecified viral hepatitis with hepatic coma</p> <p>B19.1 Unspecified viral hepatitis B</p> |
|--|--|--|--------------------------------------------------------------------------------------------------------------------------------------------------------------------------------------------------------------------------------------------------------------------------------------------------------------------------------------------------------------------------------------------------------------------------------------------------------------------------------------------------------------------------------------------------------------------------------------------------------------------------------------------------------------------------------------------------------------------------------------------------------------------------------------------------------------------------------------------------------------------------------------------------------------------------------------------------------------------------------------------------------|

|                                                                         |                           |                                                                      |                                                                                                                                                                                                                                                                                                                                                                                                                                                                                                                                           |
|-------------------------------------------------------------------------|---------------------------|----------------------------------------------------------------------|-------------------------------------------------------------------------------------------------------------------------------------------------------------------------------------------------------------------------------------------------------------------------------------------------------------------------------------------------------------------------------------------------------------------------------------------------------------------------------------------------------------------------------------------|
|                                                                         |                           |                                                                      | <p>B19.10 Unspecified viral hepatitis B without hepatic coma, Unspecified viral hepatitis B NOS</p> <p>B19.11 Unspecified viral hepatitis B with hepatic coma</p> <p>B19.2 Unspecified viral hepatitis C</p> <p>B19.20 Unspecified viral hepatitis C without hepatic coma, Viral hepatitis C NOS</p> <p>B19.21 Unspecified viral hepatitis C with hepatic coma</p> <p>B19.9 Unspecified viral hepatitis without hepatic coma, Viral hepatitis NOS</p> <p>O98.4x Viral hepatitis complicating pregnancy, childbirth and the puerperium</p> |
| <p>Chronic liver disease without cirrhosis: Alcoholic liver disease</p> | <p>571.0</p> <p>571.3</p> | <p>K70.0</p> <p>K70.2</p> <p>K70.4</p> <p>K70.4[01]</p> <p>K70.9</p> | <p><u>ICD-9 Code Descriptions</u></p> <p>571.0 Alcoholic fatty liver</p> <p>571.3 Alcoholic liver damage, unspecified</p> <p><u>ICD-10 Code Descriptions</u></p> <p>K70.0 Alcoholic fatty liver</p> <p>K70.2 Alcoholic fibrosis and sclerosis of liver</p> <p>K70.4 Alcoholic hepatic failure</p> <p>K70.4[01] Alcoholic hepatic failure without/with coma</p>                                                                                                                                                                            |

1  
2  
3  
4  
5  
6  
7  
8  
9  
10  
11  
12  
13  
14  
15  
16  
17  
18  
19  
20  
21  
22  
23  
24  
25  
26  
27  
28  
29  
30  
31  
32  
33  
34  
35  
36  
37  
38  
39  
40  
41  
42  
43  
44  
45  
46  
47

|                                                                                      |                |                                                       |                                                                                                                                                                                                                                                                                                                                                                                                                                                                                                                                                                                                                 |
|--------------------------------------------------------------------------------------|----------------|-------------------------------------------------------|-----------------------------------------------------------------------------------------------------------------------------------------------------------------------------------------------------------------------------------------------------------------------------------------------------------------------------------------------------------------------------------------------------------------------------------------------------------------------------------------------------------------------------------------------------------------------------------------------------------------|
|                                                                                      |                |                                                       | K70.9 Alcoholic liver disease, unspecified                                                                                                                                                                                                                                                                                                                                                                                                                                                                                                                                                                      |
| Chronic liver disease without cirrhosis: NAFLD/NASH                                  | 571.8          | K76.0<br>K75.81                                       | <u>ICD-9 Code Descriptions</u><br>571.8 Other chronic nonalcoholic liver disease<br><br><u>ICD-10 Code Descriptions</u><br>K76.0 Fatty (change of) liver, not elsewhere classified, Nonalcoholic fatty liver disease (NAFLD)<br>K75.81 Nonalcoholic steatohepatitis (NASH)                                                                                                                                                                                                                                                                                                                                      |
| Chronic liver disease without cirrhosis: Autoimmune, aside from autoimmune hepatitis | 571.6<br>576.1 | K74.3<br>K74.5<br>K75.3<br>K75.8[9]<br>K75.9<br>K83.0 | <u>ICD-9 Code Descriptions</u><br>571.6 Biliary cirrhosis [ <i>counts as "other chronic liver disease without cirrhosis" if there is no portal hypertensive decompensation event (including non-bleeding varices) or portal hypertension associated with it</i> ]<br>576.1 Cholangitis (captures primary sclerosing cholangitis)<br><br><u>ICD-10 Code Descriptions</u><br><i>The following group of codes are coded as "other chronic liver disease without cirrhosis" if there is no portal hypertensive decompensation event (including non-bleeding varices) or portal hypertension associated with it.</i> |

|                                                                                      |                                          |                                                 |                                                                                                                                                                                                                                                                                                                                                                                                                                                                    |
|--------------------------------------------------------------------------------------|------------------------------------------|-------------------------------------------------|--------------------------------------------------------------------------------------------------------------------------------------------------------------------------------------------------------------------------------------------------------------------------------------------------------------------------------------------------------------------------------------------------------------------------------------------------------------------|
|                                                                                      |                                          |                                                 | <p>K74.3 Primary biliary cirrhosis, Chronic nonsuppurative destructive cholangitis</p> <p>K74.5 Biliary cirrhosis, unspecified</p> <p>K75.3 Granulomatous hepatitis, not elsewhere classified</p> <p>K75.8 Other specified inflammatory liver diseases</p> <p>K75.89 Other specified inflammatory liver diseases</p> <p>K75.9 Inflammatory liver disease, unspecified</p> <p>K83.0 Cholangitis without liver abscess (captures primary sclerosing cholangitis)</p> |
| <p>Chronic liver disease without cirrhosis:<br/>Copper/Iron Metabolism Disorders</p> | <p>275.01</p> <p>275.03</p> <p>275.1</p> | <p>E83.01</p> <p>E83.11</p> <p>E83.11[0189]</p> | <p><u>ICD-9 Code Descriptions</u></p> <p>275.01 Hereditary hemochromatosis</p> <p>275.03 Other hemochromatosis</p> <p>275.1 Disorders of copper metabolism (captures Wilson's disease)</p> <p><u>ICD-10 Code Descriptions</u></p> <p>E83.01 Wilson's disease</p> <p>E83.11 Hemochromatosis</p> <p>E83.110 Hereditary hemochromatosis: Bronzed diabetes, Pigmentary cirrhosis (of liver), Primary (hereditary) hemochromatosis</p>                                  |

1  
2  
3  
4  
5  
6  
7  
8  
9  
10  
11  
12  
13  
14  
15  
16  
17  
18  
19  
20  
21  
22  
23  
24  
25  
26  
27  
28  
29  
30  
31  
32  
33  
34  
35  
36  
37  
38  
39  
40  
41  
42  
43  
44  
45  
46  
47

|                                                       |                                                                  |                                                                                                                                               |                                                                                                                                                                                                                                                                                                                                                                                                                                                                                                                                                                                                             |
|-------------------------------------------------------|------------------------------------------------------------------|-----------------------------------------------------------------------------------------------------------------------------------------------|-------------------------------------------------------------------------------------------------------------------------------------------------------------------------------------------------------------------------------------------------------------------------------------------------------------------------------------------------------------------------------------------------------------------------------------------------------------------------------------------------------------------------------------------------------------------------------------------------------------|
|                                                       |                                                                  |                                                                                                                                               | <p>E83.111 Hemochromatosis due to repeated red blood cell transfusions: Iron overload due to repeated red blood cell transfusions, Transfusion (red blood cell) associated hemochromatosis</p> <p>E83.118 Other hemochromatosis</p> <p>E83.119 Hemochromatosis, unspecified</p>                                                                                                                                                                                                                                                                                                                             |
| <p>Chronic liver disease without cirrhosis: Other</p> | <p>571.9</p> <p>573.9</p> <p>573.0</p> <p>273.4</p> <p>453.0</p> | <p>K76.8</p> <p>K76.9</p> <p>K77</p> <p>K74.4</p> <p>E88.01</p> <p>I82.0</p> <p>K76.1</p> <p>K76.4</p> <p>K76.5</p> <p>K76.8</p> <p>K76.9</p> | <p><u>ICD-9 Code Descriptions</u></p> <p>571.9 Unspecified chronic liver disease without mention of alcohol</p> <p>573.9 Unspecified disorder of liver</p> <p>573.0 Chronic passive congestion of liver</p> <p>273.4 Alpha 1 antitrypsin deficiency</p> <p>453.0 Budd-Chiari syndrome</p> <p><u>ICD-10 Code Descriptions</u></p> <p>K76.8 Other specified diseases of liver</p> <p>K76.9 Liver disease, unspecified</p> <p>K77 Liver disorders in diseases classified elsewhere</p> <p>K74.4 Secondary biliary cirrhosis</p> <p>E88.01 Alpha 1 antitrypsin deficiency</p> <p>I82.0 Budd-Chiari syndrome</p> |

|                      |                                                                                                                          |                                                                                                                                                                                                                                         |                                                                                                                                                                                                                                                                                                                                                                                                                                                                                                                                                                                                                                                                                                                                                                                                                                                   |
|----------------------|--------------------------------------------------------------------------------------------------------------------------|-----------------------------------------------------------------------------------------------------------------------------------------------------------------------------------------------------------------------------------------|---------------------------------------------------------------------------------------------------------------------------------------------------------------------------------------------------------------------------------------------------------------------------------------------------------------------------------------------------------------------------------------------------------------------------------------------------------------------------------------------------------------------------------------------------------------------------------------------------------------------------------------------------------------------------------------------------------------------------------------------------------------------------------------------------------------------------------------------------|
|                      |                                                                                                                          |                                                                                                                                                                                                                                         | <p>K76.1 Chronic passive congestion of liver, Cardiac cirrhosis<br/>Cardiac sclerosis</p> <p>K76.4 Peliosis hepatis, Hepatic angiomatosis – other</p> <p>K76.5 Hepatic veno-occlusive disease</p>                                                                                                                                                                                                                                                                                                                                                                                                                                                                                                                                                                                                                                                 |
| <b>Exclusions</b>    |                                                                                                                          |                                                                                                                                                                                                                                         |                                                                                                                                                                                                                                                                                                                                                                                                                                                                                                                                                                                                                                                                                                                                                                                                                                                   |
| Acute Liver Diseases | <p>573.1</p> <p>573.2</p> <p>573.3</p> <p>070.0</p> <p>070.1</p> <p>070.41</p> <p>070.43</p> <p>070.51</p> <p>070.53</p> | <p>K71.0</p> <p>K71.1[01]</p> <p>K71.2</p> <p>K71.6</p> <p>K71.8</p> <p>K71.9</p> <p>K75.2</p> <p>B15</p> <p>B15.0</p> <p>B15.9</p> <p>B16</p> <p>B16.0</p> <p>B16.1</p> <p>B16.2</p> <p>B16.9</p> <p>B17</p> <p>B17.0</p> <p>B17.1</p> | <p>Excluded from analysis, unless a concomitant chronic liver disease or cirrhosis existed, then included with Cirrhosis group or Chronic Liver Disease without Cirrhosis group.</p> <p><u>ICD-9 Code Descriptions</u></p> <p>573.1 Hepatitis in viral diseases classified elsewhere [Coxsackie virus disease (074.8), cytomegalic inclusion virus disease (078.5), infectious mononucleosis (075), but does not include hepatitis (in): mumps (072.71), viral (070.0-070.9), yellow fever (060.0-060.9)]</p> <p>573.2 Hepatitis in other infectious diseases classified elsewhere [Does not include hepatitis in: late syphilis (095.3), secondary syphilis (091.62), toxoplasmosis (130.5)]</p> <p>573.3 Hepatitis, unspecified; Toxic (noninfectious) hepatitis</p> <p>070.0, 070.1 Viral hepatitis A with/without mention of hepatic coma</p> |

1  
2  
3  
4  
5  
6  
7  
8  
9  
10  
11  
12  
13  
14  
15  
16  
17  
18  
19  
20  
21  
22  
23  
24  
25  
26  
27  
28  
29  
30  
31  
32  
33  
34  
35  
36  
37  
38  
39  
40  
41  
42  
43  
44  
45  
46  
47

|  |  |           |                                                                                                    |
|--|--|-----------|----------------------------------------------------------------------------------------------------|
|  |  | B17.1[01] | 070.41 Acute hepatitis C with hepatic coma                                                         |
|  |  | B17.2     | 070.43 Hepatitis E with hepatic coma                                                               |
|  |  | B17.8     | 070.51 Acute hepatitis C without mention of hepatic coma                                           |
|  |  | B17.9     | 070.53 Hepatitis E without mention of hepatic coma                                                 |
|  |  |           | <u>ICD-10 Code Descriptions</u>                                                                    |
|  |  |           | K71.0 Toxic liver disease with cholestasis; Cholestasis with hepatocyte injury; 'Pure' cholestasis |
|  |  |           | K71.1 Toxic liver disease with hepatic necrosis                                                    |
|  |  |           | K71.10 Toxic liver disease with hepatic necrosis, without coma                                     |
|  |  |           | K71.11 Toxic liver disease with hepatic necrosis, with coma                                        |
|  |  |           | K71.2 Toxic liver disease with acute hepatitis                                                     |
|  |  |           | K71.6 Toxic liver disease with hepatitis, not elsewhere classified                                 |
|  |  |           | K71.8 Toxic liver disease with other disorders of liver                                            |
|  |  |           | K71.9 Toxic liver disease, unspecified                                                             |
|  |  |           | K72.0 Acute and subacute hepatic failure                                                           |
|  |  |           | K72.00 Acute and subacute hepatic failure without coma                                             |
|  |  |           | K72.01 Acute and subacute hepatic failure with coma                                                |
|  |  |           | K75.2 Nonspecific reactive hepatitis                                                               |
|  |  |           | B15 Acute hepatitis A                                                                              |

|                        |                 |                        |                                                                                                                                                                                                                                                                                                                                                                                                                                                                                                                                                                                                                                                                                                                                                                                                                                                                                                                                                        |
|------------------------|-----------------|------------------------|--------------------------------------------------------------------------------------------------------------------------------------------------------------------------------------------------------------------------------------------------------------------------------------------------------------------------------------------------------------------------------------------------------------------------------------------------------------------------------------------------------------------------------------------------------------------------------------------------------------------------------------------------------------------------------------------------------------------------------------------------------------------------------------------------------------------------------------------------------------------------------------------------------------------------------------------------------|
|                        |                 |                        | <p>B15.0 Hepatitis A with hepatic coma</p> <p>B15.9 Hepatitis A without hepatic coma; Hepatitis A (acute)(viral) NOS</p> <p>B16 Acute hepatitis B</p> <p>B16.0 Acute hepatitis B with delta-agent with hepatic coma</p> <p>B16.1 Acute hepatitis B with delta-agent without hepatic coma</p> <p>B16.2 Acute hepatitis B without delta-agent with hepatic coma</p> <p>B16.9 Acute hepatitis B without delta-agent and without hepatic coma; Hepatitis B (acute) (viral) NOS</p> <p>B17 Other acute viral hepatitis</p> <p>B17.0 Acute delta-(super) infection of hepatitis B carrier</p> <p>B17.1 Acute hepatitis C</p> <p>B17.10 Acute hepatitis C without hepatic coma; Acute hepatitis C NOS</p> <p>B17.11 Acute hepatitis C with hepatic coma</p> <p>B17.2 Acute hepatitis E</p> <p>B17.8 Other specified acute viral hepatitis; Hepatitis non-A non-B (acute) (viral) NEC</p> <p>B17.9 Acute viral hepatitis, unspecified; Acute hepatitis NOS</p> |
| Prior Liver Transplant | 996.82<br>V42.7 | T86.4[01239]<br>Z48.23 | <u>ICD-9 Code Descriptions</u>                                                                                                                                                                                                                                                                                                                                                                                                                                                                                                                                                                                                                                                                                                                                                                                                                                                                                                                         |



1  
2  
3  
4  
5  
6  
7  
8  
9  
10  
11  
12  
13  
14  
15  
16  
17  
18  
19  
20  
21  
22  
23  
24  
25  
26  
27  
28  
29  
30  
31  
32  
33  
34  
35  
36  
37  
38  
39  
40  
41  
42  
43  
44  
45  
46  
47

|                        |  |       |                                                                                                                                                                                                                                                                                                                                                                                                                                                                                                                                                                                                                                                                                                      |
|------------------------|--|-------|------------------------------------------------------------------------------------------------------------------------------------------------------------------------------------------------------------------------------------------------------------------------------------------------------------------------------------------------------------------------------------------------------------------------------------------------------------------------------------------------------------------------------------------------------------------------------------------------------------------------------------------------------------------------------------------------------|
|                        |  | Z94.4 | <p>996.82 Complications of transplanted organ; Transplant failure or rejection: Liver</p> <p>V42.7 Organ or tissue replaced by transplant: Liver</p> <p><u>ICD-10 Code Descriptions</u></p> <p>T86.4 Complications of liver transplant</p> <p>T86.40 Unspecified complication of liver transplant</p> <p>T86.41 Liver transplant rejection</p> <p>T86.42 Liver transplant failure</p> <p>T86.43 Liver transplant infection</p> <p>Use additional code to identify infection, such as:</p> <p>Cytomegalovirus (CMV) infection (B25.-)</p> <p>T86.49 Other complications of liver transplant</p> <p>Z48.23 Encounter for aftercare following liver transplant</p> <p>Z94.4 Liver transplant status</p> |
| <b>Pregnancy Codes</b> |  |       |                                                                                                                                                                                                                                                                                                                                                                                                                                                                                                                                                                                                                                                                                                      |
| Pregnancy Definitions  |  |       | <p>Discharge codes and Procedure Codes were considered for identifying pregnancy records. To avoid counting multiple records for the same pregnancy, codes that indicated an end of pregnancy event were searched. Non-natural causes of termination events were excluded from analysis, as were miscarriages and spontaneous or missed abortions.</p>                                                                                                                                                                                                                                                                                                                                               |

| Pregnancy       | <u>Discharge Codes</u> | <u>Discharge Codes</u> | <u>Discharge Codes</u>                                             |
|-----------------|------------------------|------------------------|--------------------------------------------------------------------|
| Inclusion Codes | 632                    | O60.10X[0123459]       | Preterm labor with preterm delivery                                |
|                 | 634.[0-9][012]         | O60.12X[0123459]       | Term delivery with preterm labor                                   |
|                 | 640.[09]1              | O60.13X[0123459]       | Outcome of delivery indicator                                      |
|                 | 641.[012389]1          | O60.14X[0123459]       |                                                                    |
|                 | 642.[012345679][1      | O60.2                  | O80 Encounter for full-term uncomplicated delivery                 |
|                 | 2]                     | O60.20                 | Delivery requiring minimal or no assistance, with or without       |
|                 | 643.[01289]1           | O60.20X[0123459]       | episiotomy, without fetal manipulation [e.g., rotation version] or |
|                 | 644.21                 | O60.22                 | instrumentation [forceps] of a spontaneous, cephalic, vaginal,     |
|                 | 645.[12]1              | O60.22X[0123459]       | full-term, single, live-born infant. This code is for use as a     |
|                 | 646.[0123456789]1      | O60.23                 | single diagnosis code and is not to be used with any other         |
|                 | 646.[124568]2          | O60.23X[0123459]       | code from chapter 15.                                              |
|                 | 647.[012345689][1      | O80                    | Use additional code to indicate outcome of delivery (Z37.0)        |
|                 | 2]                     | O82 (these two         |                                                                    |
|                 | 648.[0123456789][      | should be              | O82 Encounter for cesarean delivery without indication             |
|                 | 12]                    | superfluous when       | Use additional code to indicate outcome of delivery (Z37.0)        |
|                 | 649.[012345678]1       | Z37 is accounted       |                                                                    |
|                 | 649.[0123468]2         | for)                   | <u>Procedure Codes</u>                                             |
|                 | 650                    | Z37                    | Low/Mid/High forceps operation, Outlet forceps operation           |
|                 | 651.[0123456789]1      | Z37.[012345679]        | Forceps rotation of fetal head: DeLee maneuver, Key-in-lock        |
|                 | 652.[0123456789]1      | Z37.5[012349]          | rotation, Kielland rotation, Scanzoni's maneuver;                  |
|                 | 653.[0123456789]1      | Z37.6[012349]          | Breech extraction                                                  |
|                 | 654.[0123456789]1      |                        | Partial breech extraction with forceps to aftercoming head         |
|                 | 654.[013456789]2       | <u>Procedure Codes</u> | Other partial breech extraction                                    |

1  
2  
3  
4  
5  
6  
7  
8  
9  
10  
11  
12  
13  
14  
15  
16  
17  
18  
19  
20  
21  
22  
23  
24  
25  
26  
27  
28  
29  
30  
31  
32  
33  
34  
35  
36  
37  
38  
39  
40  
41  
42  
43  
44  
45  
46  
47

|                   |               |                                                                                                                          |
|-------------------|---------------|--------------------------------------------------------------------------------------------------------------------------|
| 655.[0123456789]1 | 0W8NXZZ       | Total breech extraction with forceps to aftercoming head                                                                 |
| 656.[012356789]1  | 10D00Z[012]   | Other total breech extraction                                                                                            |
| 656.4[013]        | 10D07Z[34568] | Forceps application to aftercoming head, Piper forceps operation.                                                        |
| 657.01            | 10S07ZZ       | Vacuum extraction                                                                                                        |
| 658.[0123489]1    |               | Other instrumental delivery                                                                                              |
| 659.[0123456789]1 |               | Cesarean section                                                                                                         |
| 660.[0123456789]1 |               | Other cesarean section of unspecified type: Cesarean section NOS, Obstetrical abdominouterotomy, Obstetrical hysterotomy |
| 661.[012349]1     |               |                                                                                                                          |
| 662.[0123]1       |               |                                                                                                                          |
| 663.[012345689]1  |               |                                                                                                                          |
| 664.[012345689]1  |               |                                                                                                                          |
| 665.[013456789]1  |               |                                                                                                                          |
| 665.[2789]2       |               |                                                                                                                          |
| 666.[0123]2       |               |                                                                                                                          |
| 667.[01]2         |               |                                                                                                                          |
| 668.[01289][12]   |               |                                                                                                                          |
| 669.[012456789]1  |               |                                                                                                                          |
| 669.[0123489]2    |               |                                                                                                                          |
| 670.[01238]2      |               |                                                                                                                          |
| 671.[0123589]1    |               |                                                                                                                          |
| 671.[0124589]2    |               |                                                                                                                          |
| 672.02            |               |                                                                                                                          |
| 673.[01238]1      |               |                                                                                                                          |
| 673.[01238]2      |               |                                                                                                                          |

|                                                                                                                                                                                                 |                                                                                                                                                                                                                                                                                          |                                                                                                           |                                                                         |
|-------------------------------------------------------------------------------------------------------------------------------------------------------------------------------------------------|------------------------------------------------------------------------------------------------------------------------------------------------------------------------------------------------------------------------------------------------------------------------------------------|-----------------------------------------------------------------------------------------------------------|-------------------------------------------------------------------------|
| 1<br>2<br>3<br>4<br>5<br>6<br>7<br>8<br>9<br>10<br>11<br>12<br>13<br>14<br>15<br>16<br>17<br>18<br>19<br>20<br>21<br>22<br>23<br>24<br>25<br>26<br>27<br>28<br>29<br>30<br>31<br>32<br>33<br>34 | 674.[05]1<br>674.[01234589]2<br>675.[01289]1<br>675.[01289]2<br>676.[012345689]1<br>676.[012345689]2<br>678.[01]1<br>679.[01]1<br>679.[01]2<br>V27.[012345679]<br><br><u>Procedure Codes</u><br>72.[0123456789]<br>72.2[19]<br>72.3[19]<br>72.5[1234]<br>72.7[19]<br>74.[01249]<br>74.99 |                                                                                                           |                                                                         |
| 35<br>36<br>37<br>38<br>39<br>40<br>41<br>42<br>43<br>44<br>45<br>46<br>47                                                                                                                      | Pregnancy<br>Exclusion Codes                                                                                                                                                                                                                                                             | <u>Discharge Codes</u><br>Pregnant with non-natural termination:<br>630                                   | <u>Discharge Codes</u><br>Pregnant with non-natural termination:<br>O00 |
|                                                                                                                                                                                                 |                                                                                                                                                                                                                                                                                          | <u>Discharge Codes</u><br>Ectopic pregnancy<br>Hydatidiform mole<br>Other abnormal products of conception |                                                                         |

1  
2  
3  
4  
5  
6  
7  
8  
9  
10  
11  
12  
13  
14  
15  
16  
17  
18  
19  
20  
21  
22  
23  
24  
25  
26  
27  
28  
29  
30  
31  
32  
33  
34  
35  
36  
37  
38  
39  
40  
41  
42  
43  
44  
45  
46  
47

|                   |                    |                                                              |
|-------------------|--------------------|--------------------------------------------------------------|
| 631               | O00.[01289]        | (Induced) termination of pregnancy                           |
| 631.[08]          | O01                | Failed attempted termination of pregnancy                    |
| 633               | O01.[019]          | Miscarriage or spontaneous/missed abortion                   |
| 633.0             | O02                |                                                              |
| 633.0[01]         | O02.[089]          | <u>Procedure Codes</u>                                       |
| 633.1             | O02.8              | Dilation and curettage for termination of pregnancy          |
| 633.1[01]         | O02.8[19]          | Aspiration curettage of uterus for termination of pregnancy, |
| 633.2             | O02.9              | Therapeutic abortion NOS                                     |
| 633.2[01]         | O04.8              | Removal of extratubal ectopic pregnancy                      |
| 633.8             | O04.8[09]          | Hysterotomy to terminate pregnancy, Therapeutic abortion by  |
| 633.8[01]         | O07                | hysterotomy                                                  |
| 633.9             |                    | Intra-amniotic injection for abortion                        |
| 633.9[01]         | Miscarriage or     |                                                              |
| 635.[012345679][0 | spontaneous/missed |                                                              |
| 12]               | abortion:          |                                                              |
| 636.[012345679][0 | O02.1              |                                                              |
| 12]               | O03                |                                                              |
| 637.[012345679][0 | O03.[012]          |                                                              |
| 12]               | O03.3              |                                                              |
| 638               | O03.3[0123456789]  |                                                              |
| 638.[0123456789]  | O03.[45678]        |                                                              |
|                   | O03.8[0123456789]  |                                                              |
|                   | O03.9              |                                                              |

|                                                                                      |                                                                                                                                                                                             |                                                                                                                                 |                                                                                                                                                                                                                                                                                                                                                                                 |
|--------------------------------------------------------------------------------------|---------------------------------------------------------------------------------------------------------------------------------------------------------------------------------------------|---------------------------------------------------------------------------------------------------------------------------------|---------------------------------------------------------------------------------------------------------------------------------------------------------------------------------------------------------------------------------------------------------------------------------------------------------------------------------------------------------------------------------|
|                                                                                      | Miscarriage or<br>spontaneous/mis-<br>sessed abortion:<br>634.[0123456789][<br>012]<br><br><u>Procedure Codes</u><br>Non-naturally<br>terminated<br>69.01<br>69.51<br>74.3<br>74.91<br>75.0 | <u>Procedure Codes</u><br>Non-naturally<br>terminated<br>10A0[034]ZZ<br>10A07Z6<br>10A07ZX<br>10A07ZZ<br>10A08ZZ<br>10T2[034]ZZ |                                                                                                                                                                                                                                                                                                                                                                                 |
| <b>Study Outcomes</b>                                                                |                                                                                                                                                                                             |                                                                                                                                 |                                                                                                                                                                                                                                                                                                                                                                                 |
| Hypertensive<br>complication (pre-<br>eclampsia,<br>eclampsia, or<br>HELLP syndrome) | 642.4x<br>642.7x<br>642.5x<br>642.6x                                                                                                                                                        | O14.00<br>O14.90<br>O14.0[23]<br>O14.9[23]<br>O15.2<br>O11.9<br>O11.[123]<br>O15.2<br>O14.10                                    | Mild or unspecified pre-eclampsia<br>Mild to moderate pre-eclampsia, unspecified trimester<br>Unspecified pre-eclampsia, unspecified trimester<br>Mild to moderate pre-eclampsia, [second/third] trimester<br>Unspecified pre-eclampsia, [second/third] trimester<br>Eclampsia in the puerperium<br><br>Pre-eclampsia or eclampsia superimposed on pre-existing<br>hypertension |

1  
2  
3  
4  
5  
6  
7  
8  
9  
10  
11  
12  
13  
14  
15  
16  
17  
18  
19  
20  
21  
22  
23  
24  
25  
26  
27  
28  
29  
30  
31  
32  
33  
34  
35  
36  
37  
38  
39  
40  
41  
42  
43  
44  
45  
46  
47

|                            |                                                      |                                                                                    |                                                                                                                                                                                                                                                                                                                                                                                                                                                                                                                                                                                                                                           |
|----------------------------|------------------------------------------------------|------------------------------------------------------------------------------------|-------------------------------------------------------------------------------------------------------------------------------------------------------------------------------------------------------------------------------------------------------------------------------------------------------------------------------------------------------------------------------------------------------------------------------------------------------------------------------------------------------------------------------------------------------------------------------------------------------------------------------------------|
|                            |                                                      | O14.20<br>O14.1[23]<br>O14.2[23]<br>O15.00<br>O15.9<br>O15.0[23]<br>O15.1<br>O15.2 | Pre-existing hypertension with pre-eclampsia, unspecified trimester<br>Pre-existing hypertension with pre-eclampsia, [first/second/third] trimester<br>Eclampsia in the puerperium<br>Severe pre-eclampsia/HELLP<br>Severe pre-eclampsia, unspecified trimester<br>HELLP syndrome (HELLP), unspecified trimester<br>Severe pre-eclampsia, [second/third] trimester<br>HELLP syndrome (HELLP), [second/third] trimester<br>Eclampsia<br>Eclampsia in pregnancy, unspecified trimester<br>Eclampsia, unspecified as to time period<br>Eclampsia in pregnancy, [second/third] trimester<br>Eclampsia in labor<br>Eclampsia in the puerperium |
| Postpartum hemorrhage      | 666.0[024]<br>666.1[024]<br>666.2[024]<br>666.3[024] | O72.[0123]                                                                         |                                                                                                                                                                                                                                                                                                                                                                                                                                                                                                                                                                                                                                           |
| Pre-term birth (<37 weeks) | 644.20<br>644.21                                     | O60.10xx[0123459]<br>O60.12xx[0123459]                                             | Codes (644.20, 644.21) each include:                                                                                                                                                                                                                                                                                                                                                                                                                                                                                                                                                                                                      |

|                           |                          |                                                                                                                    |                                                                                                                                                                                                    |
|---------------------------|--------------------------|--------------------------------------------------------------------------------------------------------------------|----------------------------------------------------------------------------------------------------------------------------------------------------------------------------------------------------|
|                           |                          | O60.13xx[0123459]<br>O60.14xx[0123459]                                                                             | Onset (spontaneous) of delivery before 37 completed weeks of gestation<br>Premature labor with onset of delivery before 37 completed weeks of gestation<br><br>Preterm labor with preterm delivery |
| Fetal growth restriction  | 656.5[013]               | O36.59[1239]                                                                                                       |                                                                                                                                                                                                    |
| Large for gestational age | 653.5[013]<br>656.6[013] | O36.60X[0123459]<br>O36.61X[0123459]<br>O36.62X[0123459]<br>O36.63X[0123459]                                       |                                                                                                                                                                                                    |
| Fetal death               | 656.4[013]               | V27.1<br>V27.3<br>V27.4<br>V27.6<br>V27.7<br>Z37.1<br>Z37.3<br>Z37.4<br>Z37.6[012349]<br>Z37.7<br>O36.4XX[0123459] | Stillborn (at least one, if multiple gestation)<br>Fetal death: NOS, after completion of 22 weeks' gestation, late, Missed delivery                                                                |



1  
2  
3  
4  
5  
6  
7  
8  
9  
10  
11  
12  
13  
14  
15  
16  
17  
18  
19  
20  
21  
22  
23  
24  
25  
26  
27  
28  
29  
30  
31  
32  
33  
34  
35  
36  
37  
38  
39  
40  
41  
42  
43  
44  
45  
46  
47

| <b>Additional Variables</b> |                                                                                                                                                        |                                                                                                                                                                                                                                     |                                                                                                                                                                                                                                                                                                                                                                                                                                                                                                                                                                                                   |
|-----------------------------|--------------------------------------------------------------------------------------------------------------------------------------------------------|-------------------------------------------------------------------------------------------------------------------------------------------------------------------------------------------------------------------------------------|---------------------------------------------------------------------------------------------------------------------------------------------------------------------------------------------------------------------------------------------------------------------------------------------------------------------------------------------------------------------------------------------------------------------------------------------------------------------------------------------------------------------------------------------------------------------------------------------------|
| Diabetes, pre-existing      | without chronic complications:<br>249.00-249.31<br>250.00-250.33<br>648.00-648.04<br><br>with chronic complications:<br>249.40-249.91<br>250.40-250.93 | without chronic complications:<br>E08.xx<br>E09.xx<br>E10.xx<br>E11.xx<br>E13.xx<br>O24.[01389]xx<br><br>with chronic complications:<br>E08.[234568]xxx<br>E09.[234568]xxx<br>E10.[234568]xxx<br>E11.[234568]xxx<br>E13.[234568]xxx | ICD-9 Codes based on this source, with minor modification to remove codes specifically for fetal records: <a href="https://www.hcup-us.ahrq.gov/toolssoftware/comorbidity/Table2-FY12-V3_7.pdf">https://www.hcup-us.ahrq.gov/toolssoftware/comorbidity/Table2-FY12-V3_7.pdf</a><br><br>ICD-10 Codes based on this source, with minor modification to remove codes specifically for fetal records: <a href="https://www.hcup-us.ahrq.gov/toolssoftware/comorbidityicd10/comformat_icd10cm_2019_1.txt">https://www.hcup-us.ahrq.gov/toolssoftware/comorbidityicd10/comformat_icd10cm_2019_1.txt</a> |
| Hypertension, pre-existing  | 401.0<br>401.1<br>401.9<br>405<br>405.0<br>405.0[19]<br>405.1[19]                                                                                      | I10.<br>I15.0<br>I15.1<br>I15.2<br>I15.8<br>I15.9<br>O10.01[1239]                                                                                                                                                                   | <u>ICD-9 Code Descriptions</u><br>401 Essential hypertension: Malignant, Benign, Unspecified<br>405 Secondary hypertension: Malignant (Renovascular, Other), Benign (Renovascular, Other), Unspecified (Renovascular, Other)<br>642.0 Benign essential hypertension complicating pregnancy, childbirth, and the puerperium                                                                                                                                                                                                                                                                        |

|    |            |              |                                                               |
|----|------------|--------------|---------------------------------------------------------------|
| 1  | 405.9      | O10.02       | 642.1 Hypertension secondary to renal disease, complicating   |
| 2  | 405.9[19]  | O10.03       | pregnancy, childbirth, and the puerperium                     |
| 3  | 642.0[0-4] | O10.41[1239] | 642.2 Other pre-existing hypertension complicating            |
| 4  | 642.1[0-4] | O10.42       | pregnancy, childbirth, and the puerperium                     |
| 5  | 642.2[0-4] | O10.43       | 642.7 Pre-eclampsia or eclampsia superimposed on pre-         |
| 6  | 642.7[0-4] | O10.91[1239] | existing hypertension                                         |
| 7  | 642.9[0-4] | O10.92       | 642.9 Unspecified hypertension complicating pregnancy,        |
| 8  |            | O10.93       | childbirth, or the puerperium                                 |
| 9  |            | O11.9        |                                                               |
| 10 |            | O11.1        | <u>ICD-10 Code Descriptions</u>                               |
| 11 |            | O11.2        | Essential (primary) hypertension                              |
| 12 |            | O11.3        | Pre-existing essential hypertension complicating pregnancy or |
| 13 |            |              | childbirth or puerperium                                      |
| 14 |            |              | Unspecified pre-existing hypertension complicating pregnancy  |
| 15 |            |              | or childbirth or puerperium                                   |
| 16 |            |              | Renovascular hypertension                                     |
| 17 |            |              | Hypertension secondary to other renal disorders               |
| 18 |            |              | Pre-existing secondary hypertension complicating pregnancy    |
| 19 |            |              | or childbirth or puerperium                                   |
| 20 |            |              | Pre-existing hypertension with pre-eclampsia                  |
| 21 |            |              | Hypertension secondary to endocrine disorders                 |
| 22 |            |              | Other secondary hypertension                                  |
| 23 |            |              | Secondary hypertension, unspecified                           |
| 24 |            |              |                                                               |
| 25 |            |              |                                                               |
| 26 |            |              |                                                               |
| 27 |            |              |                                                               |
| 28 |            |              |                                                               |
| 29 |            |              |                                                               |
| 30 |            |              |                                                               |
| 31 |            |              |                                                               |
| 32 |            |              |                                                               |
| 33 |            |              |                                                               |
| 34 |            |              |                                                               |
| 35 |            |              |                                                               |
| 36 |            |              |                                                               |
| 37 |            |              |                                                               |
| 38 |            |              |                                                               |
| 39 |            |              |                                                               |
| 40 |            |              |                                                               |
| 41 |            |              |                                                               |
| 42 |            |              |                                                               |
| 43 |            |              |                                                               |
| 44 |            |              |                                                               |
| 45 |            |              |                                                               |
| 46 |            |              |                                                               |
| 47 |            |              |                                                               |

|                            |                                                                                                     |                                                                                                   |                                                                                                                                                                                                                                                                                                                                                                                                                                                                                                                                        |
|----------------------------|-----------------------------------------------------------------------------------------------------|---------------------------------------------------------------------------------------------------|----------------------------------------------------------------------------------------------------------------------------------------------------------------------------------------------------------------------------------------------------------------------------------------------------------------------------------------------------------------------------------------------------------------------------------------------------------------------------------------------------------------------------------------|
| Dyslipidemia, pre-existing | 272.0<br>272.1<br>272.2<br>272.4                                                                    | E78.0<br>E78.1<br>E78.2<br>E78.4<br>E78.5                                                         | Pure hypercholesterolemia<br>Pure hyperglyceridemia<br>Mixed hyperlipidemia<br>Other hyperlipidemia<br>Hyperlipidemia, unspecified                                                                                                                                                                                                                                                                                                                                                                                                     |
| Obesity, pre-existing      | 278.01<br>278.00<br>278.03<br>649.1[01234]<br>793.91<br>V85.3[0123456789]<br>V85.4[12345]<br>V85.54 | E66.0[19]<br>E66.[1289]<br>O99.21[012345]<br>R93.9<br>Z68.3[0123456789]<br>Z68.4[12345]<br>Z68.54 | Morbid (severe) obesity due to excess calories<br>Other obesity due to excess calories<br>Drug-induced obesity<br>Morbid (severe) obesity with alveolar hypoventilation<br>Other obesity<br>Obesity, unspecified<br>Obesity complicating pregnancy<br>Obesity complicating childbirth<br>Obesity complicating the puerperium<br>Diagnostic imaging inconclusive due to excess body fat of patient<br>Body mass index (BMI) 30.0 or greater, adult<br>Body mass index (BMI) pediatric, greater than or equal to 95th percentile for age |
| Multiple gestation         | V27.2<br>V27.3<br>V27.4<br>V27.5<br>V27.6                                                           | Z37.2<br>Z37.3<br>Z37.4<br>Z37.50<br>Z37.5[12349]                                                 | Twins, both liveborn<br>Twins, one liveborn and one stillborn<br>Twins, both stillborn<br>Multiple births, unspecified, all liveborn                                                                                                                                                                                                                                                                                                                                                                                                   |

|                                                         |                                  |                                                                                                 |                                                                                                                                                                                                                                                                                                                                                                                                                                        |
|---------------------------------------------------------|----------------------------------|-------------------------------------------------------------------------------------------------|----------------------------------------------------------------------------------------------------------------------------------------------------------------------------------------------------------------------------------------------------------------------------------------------------------------------------------------------------------------------------------------------------------------------------------------|
|                                                         | V27.7                            | Z37.6[012349]<br>Z37.7                                                                          | Triplets/Quadruplets/Quintuplets/Sextuplets/Other multiple births, all liveborn<br>Triplets/Quadruplets/Quintuplets/Sextuplets/Other multiple births, some liveborn<br>Other multiple births, all stillborn                                                                                                                                                                                                                            |
| Gestational diabetes mellitus                           | 648.8[01234]                     | O99.81[045]<br>O24.4<br>O24.41<br>O24.41[049]<br>O24.42<br>O24.42[049]<br>O24.43<br>O24.43[049] | Abnormal glucose tolerance; Includes Gestational diabetes<br>Abnormal glucose complicating pregnancy, childbirth and the puerperium                                                                                                                                                                                                                                                                                                    |
| Mode of delivery:<br>Cesarean section*<br>Vaginal birth | 765<br>766<br>[767/768, 774/775] | 783<br>784<br>785<br>786<br>787<br>788<br>[768, 796, 797, 798,<br>805, 806, 807]                | ICD-9 DRG Codes, V34,<br><a href="https://www.cms.gov/icd10manual/version34-fullcode-cms/fullcode_cms/P0372.html">https://www.cms.gov/icd10manual/version34-fullcode-cms/fullcode_cms/P0372.html</a><br><br>CESAREAN SECTION WITH/WITHOUT CC/MCC<br>[VAGINAL DELIVERY WITH STERILIZATION AND/OR D&C,<br>VAGINAL DELIVERY WITH O.R. PROCEDURE EXCEPT STERILIZATION AND/OR D&C,<br>VAGINAL DELIVERY WITH/WITHOUT COMPLICATING DIAGNOSES] |

1  
2  
3  
4  
5  
6  
7  
8  
9  
10  
11  
12  
13  
14  
15  
16  
17  
18  
19  
20  
21  
22  
23  
24  
25  
26  
27  
28  
29  
30  
31  
32  
33  
34  
35  
36  
37  
38  
39  
40  
41  
42  
43  
44  
45  
46  
47

|  |  |  |                                                                                                                                                                                                                                                                                                                                                                                                                                                                                                                 |
|--|--|--|-----------------------------------------------------------------------------------------------------------------------------------------------------------------------------------------------------------------------------------------------------------------------------------------------------------------------------------------------------------------------------------------------------------------------------------------------------------------------------------------------------------------|
|  |  |  | <p>ICD-10 DRG Codes, V36 (2019),<br/> <a href="https://www.cms.gov/ICD10Manual/version36-fullcode-cms/fullcode_cms/P0370.html">https://www.cms.gov/ICD10Manual/version36-fullcode-cms/fullcode_cms/P0370.html</a></p> <p>CESAREAN SECTION WITH/WITHOUT STERILIZATION WITH/WITHOUT CC/MCC<br/> [VAGINAL DELIVERY WITH O.R. PROC EXCEPT STERIL &amp;/OR D&amp;C<br/> VAGINAL DELIVERY WITH STERILIZATION/D&amp;C WITH/WITHOUT CC/MCC<br/> VAGINAL DELIVERY WITHOUT STERILIZATION/D&amp;C WITH/WITHOUT CC/MCC]</p> |
|--|--|--|-----------------------------------------------------------------------------------------------------------------------------------------------------------------------------------------------------------------------------------------------------------------------------------------------------------------------------------------------------------------------------------------------------------------------------------------------------------------------------------------------------------------|

*\*DRG = Diagnosis Related Group. DRGs comprise a patient classification system that categorizes patients into groups that are clinically coherent and homogeneous with respect to resource use. DRGs group patients according to diagnosis, type of treatment (procedures), age, and other relevant criteria. Each hospital stay has one DRG assigned to it. Reference: Wier LM, Witt E, Burgess J EA. Hospitalizations related to diabetes in pregnancy, 2008: Statistical brief #102. In: Healthcare Cost and Utilization Project (HCUP) Statistical Briefs. Rockville, MD: Agency for Healthcare Research and Quality; 2010.*

**Supplemental Table 2.** AIH and Maternal and Perinatal Outcomes by Race: Adjusted Analyses

|                                                                                    | AIH vs Other CLD        |                  | AIH vs no CLD           |                  |
|------------------------------------------------------------------------------------|-------------------------|------------------|-------------------------|------------------|
|                                                                                    | AOR*, 95% CI            | p value          | AOR*, 95% CI            | p value          |
| <b>Maternal Outcomes (reference group: White)</b>                                  |                         |                  |                         |                  |
| Gestational DM                                                                     |                         |                  |                         |                  |
| Black                                                                              | <b>1.20 (1.01-1.41)</b> | <b>0.04</b>      | <b>0.93 (0.91-0.95)</b> | <b>&lt;0.001</b> |
| Hispanic                                                                           | <b>1.94 (1.63-2.30)</b> | <b>&lt;0.001</b> | <b>1.52 (1.49-1.55)</b> | <b>&lt;0.001</b> |
| Gestational HTN                                                                    |                         |                  |                         |                  |
| Black                                                                              | 1.09 (0.87-1.36)        | 0.44             | 1.01 (0.99-1.03)        | 0.46             |
| Hispanic                                                                           | 0.82 (0.63-1.07)        | 0.14             | <b>0.63 (0.61-0.64)</b> | <b>&lt;0.001</b> |
| Hypertensive complications<br>(pre-eclampsia, eclampsia,<br>and/or HELLP syndrome) |                         |                  |                         |                  |
| Black                                                                              | <b>1.38 (1.13-1.68)</b> | <b>0.002</b>     | <b>1.35 (1.32-1.38)</b> | <b>&lt;.001</b>  |
| Hispanic                                                                           | <b>1.60 (1.32-1.96)</b> | <b>&lt;0.001</b> | <b>1.04 (1.01-1.06)</b> | <b>0.002</b>     |
| Cesarean section                                                                   |                         |                  |                         |                  |
| Black                                                                              | 0.93 (0.85-1.02)        | 0.15             | <b>1.20 (1.19-1.21)</b> | <b>&lt;0.001</b> |
| Hispanic                                                                           | 0.97 (0.87-1.07)        | 0.55             | <b>1.07 (1.05-1.08)</b> | <b>&lt;0.001</b> |
| Postpartum hemorrhage                                                              |                         |                  |                         |                  |
| Black                                                                              | 0.73 (0.32-1.65)        | 0.44             | 1.15 (0.51-2.62)        | 0.73             |
| Hispanic                                                                           |                         |                  |                         |                  |
| Maternal death                                                                     | **                      |                  | **                      |                  |
| <b>Perinatal Outcomes (reference group: White)</b>                                 |                         |                  |                         |                  |
| Pre-term birth (<37 weeks)                                                         |                         |                  |                         |                  |
| Black                                                                              | 0.98 (0.82-1.16)        | 0.79             | <b>1.53 (1.48-1.57)</b> | <b>&lt;0.001</b> |
| Hispanic                                                                           | 1.04 (0.85-1.26)        | 0.71             | <b>1.13 (1.09-1.16)</b> | <b>&lt;0.001</b> |
| Fetal growth restriction                                                           |                         |                  |                         |                  |
| Black                                                                              | <b>0.67 (0.51-0.87)</b> | <b>0.003</b>     | 1.41 (1.37-1.46)        | <0.001           |
| Hispanic                                                                           | <b>0.47 (0.32-0.69)</b> | <b>&lt;0.001</b> | 0.71 (0.69-0.74)        | <0.001           |
| Large for gestational age                                                          |                         |                  |                         |                  |
| Black                                                                              | 0.87 (0.62-1.21)        | 0.40             | <b>0.53 (0.52-0.55)</b> | <b>&lt;0.001</b> |
| Hispanic                                                                           | 1.14 (0.82-1.58)        | 0.45             | <b>0.78 (0.76-0.80)</b> | <b>&lt;0.001</b> |
| Fetal death                                                                        | **                      |                  | **                      |                  |

Abbreviations: autoimmune hepatitis (AIH), chronic liver disease (CLD), diabetes mellitus (DM), hypertension (HTN), hemolysis, elevated liver tests, low platelets (HELLP)

\*Adjusted for age, multiple gestation, obesity, pre-existing HTN, pre-existing DM, pre-existing hyperlipidemia, and cirrhosis (when comparing AIH to other CLD)

\*\* Insufficient outcomes to determine OR
